# Supplementary material for: EphrinB2-EphB4 signalling provides Rho-mediated homeostatic control of lymphatic endothelial cell junction integrity
Source: eLife. 2020 Sep 8;9:e57732. doi: 10.7554/eLife.57732 (PMC7478896; doi:10.7554/eLife.57732)
Supplement: Figure 1—figure supplement 1—source data 1. [file elife-57732-fig1-figsupp1-data1.xlsx]

## Sheet: Sheet1
Figure 1 - figure supplement 1 - source data 1
Source data for Figure 1 - figure supplement 1A
Endothelial cell proliferation / KI67 positive endothelial cells [%]
		BEC P3	BEC P10	BEC 3w	BEC 5w			LEC P3	LEC P10	LEC 3w	LEC 5w
		73.1	36.9	3	0.9			62.2	48.3	9.2	1.1
		68.8	40.3	1.7	0.5			57.7	57.6	6.9	0.7
		71.5	36	1.7	2.3			63.5	53.1	5.1	2.9
		62.3		3.2	1.8			56.9		6.7	2
		70.6		2.2				63.9		3.7
				2.6						6.7
