# Supplementary material for: EphrinB2-EphB4 signalling provides Rho-mediated homeostatic control of lymphatic endothelial cell junction integrity
Source: eLife. 2020 Sep 8;9:e57732. doi: 10.7554/eLife.57732 (PMC7478896; doi:10.7554/eLife.57732)
Supplement: Figure 1—source data 1. [file elife-57732-fig1-data1.xlsx]

## Sheet: Sheet1
Figure 1 - source data 1
Source data for Figure 1E and 1F
Figure 1E
Organ leakage / relative permeability of skin and lung [%]
	lung	fl/fl; Cre-	fl/fl; Cre+			skin	fl/fl; Cre-	fl/fl; Cre+
	mouse 1	100.213	86.3539			mouse 1	84.585	91.7599
	mouse 2	86.3539	94.8827			mouse 2	142.943	116.206
	mouse 3	94.8827	85.2879			mouse 3	91.8219	100.395
	mouse 4	95.9488	107.676			mouse 4	85.5084	89.3281
	mouse 5	122.601	82.0896			mouse 5	109.27	80.6324
	mouse 6	100.774	154.584			mouse 6	97.489	105.929
	mouse 7		92.7505			mouse 7	126.225	109.091
	Column B	flox/flox Cre+				Column B	flox/flox Cre+
	vs.	vs,				vs.	vs,
	Column A	flox/flox Cre-				Column A	flox/flox Cre-
	Unpaired t test					Unpaired t test
	P value	0.9733				P value	0.52
	P value summary	ns				P value summary	ns
	Significantly different (P < 0.05)?	No				Significantly different (P < 0.05)?	No
	One- or two-tailed P value?	Two-tailed				One- or two-tailed P value?	Two-tailed
	t, df	t=0,03425, df=11				t, df	t=0,6627, df=12
	How big is the difference?					How big is the difference?
	Mean of column A	100.1				Mean of column A	105.4
	Mean of column B	100.5				Mean of column B	99.05
	Difference between means (B - A) ± SEM	0,3888 ± 11,35				Difference between means (B - A) ± SEM	-6,357 ± 9,593
	95% confidence interval	-24,59 to 25,37				95% confidence interval	-27,26 to 14,54
	R squared (eta squared)	0.0001066				R squared (eta squared)	0.03531
Figure 1F
Miles assay / relative permeability of the back skin [%]
	PBS	fl/fl; Cre-	fl/fl; Cre+		VEGF	fl/fl; Cre-	fl/fl; Cre+		Histamine	fl/fl; Cre-	fl/fl; Cre+
	mouse 1	80.597	208.955			471.642	564.179			1340.3	1232.84
	mouse 2	119.403	62.6866			438.806	274.627			776.119	1002.99
	mouse 3	52.7027	156.081			307.094	246.284			723.648	775.338
	mouse 4	65.8784	59.7973			315.203	185.473			681.081	1369.26
	mouse 5	181.419	65.8784			810.811	530.067			1396.62	811.824
	mouse 6	93.401	84.264			371.574	622.335			745.178	972.589
	mouse 7	106.599	131.98			344.162	585.787			655.838	771.574
	mouse 8		219.289				271.066				475.127
	Unpaired t test					Unpaired t test			Unpaired t test
	P value	0.4316				P value	0.7743		P value	0.8812
	P value summary	ns				P value summary	ns		P value summary	ns
	Significantly different (P < 0.05)?	No				Significantly different (P < 0.05)?	No		Significantly different (P < 0.05)?	No
	One- or two-tailed P value?	Two-tailed				One- or two-tailed P value?	Two-tailed		One- or two-tailed P value?	Two-tailed
	t, df	t=0,8116, df=13				t, df	t=0,2928, df=13		t, df	t=0,1524, df=13
	How big is the difference?					How big is the difference?			How big is the difference?
	Mean of column A	100				Mean of column A	437		Mean of column A	902.7
	Mean of column B	123.6				Mean of column B	410		Mean of column C	926.4
	Difference between means (B - A) ± SEM	23,62 ± 29,10				Difference between means (B - A) ± SEM	-27,06 ± 92,42		Difference between means (C - A) ± SEM	23,76 ± 155,9
	95% confidence interval	-39,25 to 86,48				95% confidence interval	-226,7 to 172,6		95% confidence interval	-313,1 to 360,6
	R squared (eta squared)	0.04822				R squared (eta squared)	0.006553		R squared (eta squared)	0.001783
