# Supplementary material for: EphrinB2-EphB4 signalling provides Rho-mediated homeostatic control of lymphatic endothelial cell junction integrity
Source: eLife. 2020 Sep 8;9:e57732. doi: 10.7554/eLife.57732 (PMC7478896; doi:10.7554/eLife.57732)
Supplement: Figure 2—figure supplement 1—source data 1. [file elife-57732-fig2-figsupp1-data1.xlsx]

## Sheet: Sheet1
Figure 2 - figure supplement 1 - source data 1
Source data for Figure 2 - figure supplement 1A
Efnb2 expression / relative expression
		flox/+ Cre + /WT	flox/flox Cre +
	mouse 1	1	0.053559
	mouse 2	0.922742	0.00278
	mouse 3	1.31211	0.008222
	mouse 4	2.17307
		Column B	flox/flox Cre +
		vs.	vs,
		Column A	flox/+ Cre + /WT
		Unpaired t test
		P value	0.0111
		P value summary	*
		Significantly different (P < 0.05)?	Yes
		One- or two-tailed P value?	Two-tailed
		t, df	t=3,924, df=5
		How big is the difference?
		Mean of column A	1.352
		Mean of column B	0.02152
		Difference between means (B - A) ± SEM	-1,330 ± 0,3391
		95% confidence interval	-2,202 to -0,4588
		R squared (eta squared)	0.7549
