# Supplementary material for: EphrinB2-EphB4 signalling provides Rho-mediated homeostatic control of lymphatic endothelial cell junction integrity
Source: eLife. 2020 Sep 8;9:e57732. doi: 10.7554/eLife.57732 (PMC7478896; doi:10.7554/eLife.57732)
Supplement: Figure 2—figure supplement 2—source data 1. [file elife-57732-fig2-figsupp2-data1.xlsx]

## Sheet: Sheet1
Figure 2 - figure supplement 2 - source data 1
Source data for Figure 2 - figure supplement 2A,B
		Efnb2-lx;Rosa26-mTmG;Prox1-CreERT2
		pups born	mutants	chylothrax formation
	Litter 1	12	3	1
	Litter 2	5	2	2
	Litter 3	6	3	3
	Litter 4	7	2	1
	Litter 5	7	2	2
	Litter 6	4	1	1
	Litter 7	6	2	2
	Litter 8	9	1	1
		56	16	13	0.81
		EphB4-lx;Rosa26-mTmG;Prox1-CreERT2
		pups born	mutants	chylothrax formation
	Litter 1	3	1	0
	Litter 2	5	3	3
	Litter 3	5	0	0
	Litter 4	6	1	1
	Litter 5	5	1	1
		24	6	5	0.83
