# Supplementary material for: EphrinB2-EphB4 signalling provides Rho-mediated homeostatic control of lymphatic endothelial cell junction integrity
Source: eLife. 2020 Sep 8;9:e57732. doi: 10.7554/eLife.57732 (PMC7478896; doi:10.7554/eLife.57732)
Supplement: Figure 2—figure supplement 3—source data 1. [file elife-57732-fig2-figsupp3-data1.xlsx]

## Sheet: Sheet1
Figure 2 - figure supplement 3 - source data 1
Source data for Figure 2 - figure supplement 3				Multiple t-tests with correction for multiple comparison using the Holm-Sidak method
junctional quantification [% of patches/catergory]
2 mice per genotype
	fl/+; Cre+						fl/fl; Cre+
	mouse 1	mouse 1	mouse 1	mouse 2	mouse 2	mouse 2	mouse 1	mouse 1	mouse 1	mouse 2	mouse 2	mouse 2
linar / thick /reticular	76	80	84	76	92	82.6087	26.087	30	13.0435	8	12	20
jagged	8	12	12	16	4	13.0435	13.0435	10	30.4348	0	16	0
discontinuous	16	8	4	8	4	4.34783	60.8696	60	56.5217	92	72	80
Multiple t-tests	Significant?	P value	Mean of fl/+ Cre+	Mean of fl/fl Cre+	Difference	SE of difference	t ratio	df	Adjusted P Value
linar / thick /reticular	Yes	<0.000001	81.77	18.19	63.58	4.297	14.8	10	<0.000001
jagged	No	0.884412	10.84	11.58	-0.7391	4.956	0.1491	10	0.884412
discontinuous	Yes	<0.000001	7.391	70.23	-62.84	5.944	10.57	10	2e-06
