# Supplementary material for: EphrinB2-EphB4 signalling provides Rho-mediated homeostatic control of lymphatic endothelial cell junction integrity
Source: eLife. 2020 Sep 8;9:e57732. doi: 10.7554/eLife.57732 (PMC7478896; doi:10.7554/eLife.57732)
Supplement: Figure 2—source data 1. [file elife-57732-fig2-data1.xlsx]

## Sheet: Sheet1
Figure 2 - source data 1
Source data for Figure 2C and 2D
Figure 2C					Figure 2D
Intercellular space / average width [um]					Junctional overlap / average length [um]
	CTRL	Efnb2 mutant				CTRL	Efnb2 mutant
	16.9227	70.6173				1.63514	2.70656
	19.3112	76.7094				1.38232	2.64538
	21.5439	33.3689				0.662681	2.01249
	51.2965	55.9875				2.6792	3.24591
	17.5616	53.473				1.80567	3.39805
	18.8362	72.8737				1.24999	3.46661
	9.76755	25.2548				0.68499	2.33761
	23.5466	136.477				1.53561	1.55674
	15.2266	26.0834				1.28584	2.76362
	17.3192	31.9595				1.26477	2.06131
	12.0673	129.083				0.749558	1.42849
	13.8486	28.5319				1.03457	1.89086
		42.322					2.58162
		27.9236					1.71073
		119.535					3.26433
		46.8492					1.82807
	Column B	Efnb2 mutant				Column B	Efnb2 mutant
	vs.	vs,				vs.	vs,
	Column A	CTRL				Column A	CTRL
	Unpaired t test					Unpaired t test
	P value	0.0011				P value	0.0001
	P value summary	**				P value summary	***
	Significantly different (P < 0.05)?	Yes				Significantly different (P < 0.05)?	Yes
	One- or two-tailed P value?	Two-tailed				One- or two-tailed P value?	Two-tailed
	t, df	t=3,687, df=26				t, df	t=4,563, df=26
	How big is the difference?					How big is the difference?
	Mean of column A	19.77				Mean of column A	1.331
	Mean of column B	61.07				Mean of column B	2.431
	Difference between means (B - A) ± SEM	41,29 ± 11,20				Difference between means (B - A) ± SEM	1,100 ± 0,2412
	95% confidence interval	18,27 to 64,32				95% confidence interval	0,6046 to 1,596
	R squared (eta squared)	0.3433				R squared (eta squared)	0.4446
