# Supplementary material for: EphrinB2-EphB4 signalling provides Rho-mediated homeostatic control of lymphatic endothelial cell junction integrity
Source: eLife. 2020 Sep 8;9:e57732. doi: 10.7554/eLife.57732 (PMC7478896; doi:10.7554/eLife.57732)
Supplement: Figure 3—figure supplement 1—source data 1. [file elife-57732-fig3-figsupp1-data1.xlsx]

## Sheet: Sheet1
Figure 3 - figure supplement 1 - source data 1
Source data for Figure3 - figure supplement 1B
Percentage of normal and disorganized alignment of PROX1high cells
Efnb2-lx;Rosa26-mTmG;Cldn11-CreERT2			Normal alignment %	Disorganised alignment %	Total valves analysed from 3 mesenteries
Efnb2 lx/lx Cre-			93	7	30
Efnb2 lx/lx Cre+			21	79	32
