# Supplementary material for: EphrinB2-EphB4 signalling provides Rho-mediated homeostatic control of lymphatic endothelial cell junction integrity
Source: eLife. 2020 Sep 8;9:e57732. doi: 10.7554/eLife.57732 (PMC7478896; doi:10.7554/eLife.57732)
Supplement: Figure 3—source data 1. [file elife-57732-fig3-data1.xlsx]

## Sheet: Sheet1
Figure 3 - source data 1
Source data for Figure 3C and 3E
Figure 3C				Multiple t-tests with correction for multiple comparison using the Holm-Sidak method
junctional quantification [% of patches/catergory]
3 mice per genotype
		fl/+; Cre+ (genotype) upstream (region)							fl/+; Cre+ upstream							fl/fl; Cre+ updstream							fl/fl; Cre+ updstream
		mouse 1	mouse 1	mouse 2	mouse 2	mouse 3	mouse 3		mouse 1	mouse 1	mouse 2	mouse 2	mouse 3	mouse 3		mouse 4	mouse 4	mouse 5	mouse 5	mouse 6	mouse 6		mouse 4	mouse 4	mouse 5	mouse 5	mouse 6	mouse 6
	linear	56.25	43.75	15.3846	33.3333	31.25	87.5		81.25	56.25	73.3333	18.75	46.6667	75		0	6.25	12.5	6.25				0	12.5	0	6.25	0	0
	thick/reticular	43.75	37.5	46.1538	46.6667	50	12.5		12.5	31.25	20	50	40	18.75		6.66667	31.25	18.75	0				6.66667	31.25	7.69231	75	26.6667	6.25
	jagged	0	18.75	30.7692	20	18.75	0		6.25	12.5	6.66667	31.25	13.3333	6.25		40	18.75	18.75	31.25				20	18.75	15.3846	0	13.3333	12.5
	discontinous	0	0	7.69231	0	0	0		0	0	0	0	0	0		53.3333	43.75	50	62.5				73.3333	37.5	76.9231	18.75	60	81.25
Multiple t-tests	Significant?	P value	Mean of fl/fl Cre- upstream	Mean of fl/fl Cre+ upstream	Difference	SE of difference	t ratio	df	adjusted P value
straight	No	0.018076	44.58	6.25	38.33	12.94	2.963	8	0.053253
thick	No	0.02205	39.43	14.17	25.26	8.917	2.833	8	0.053253
perpendicular	No	0.133904	14.71	27.19	-12.48	7.48	1.668	8	0.133904
discontinuous	Yes	<0,000001	1.282	52.4	-51.11	3.482	14.68	8	2e-06
Multiple t-tests	Significant?	P value	Mean of fl/fl Cre- downstream	Mean of fl/fl Cre+ downstream	Difference	SE of difference	t ratio	df	adjusted P value
linear	Yes	0.000208	58.54	3.125	55.42	9.784	5.664	10	0.00079
thick/reticular	No	0.802592	28.75	25.59	3.162	12.32	0.2567	10	0.96103
jagged	No	0.901895	12.71	13.33	-0.6197	4.901	0.1264	10	0.96103
discontinous	Yes	0.000197	0	57.96	-57.96	10.16	5.703	10	0.00079
Figure 3E				Multiple t-tests with correction for multiple comparison using the Holm-Sidak method
junctional quantification [% of patches/catergory]
2 mice per genotype
		fl/+; Cre+ (genotype) upstream (region)					fl/+; Cre+ downstream					fl/fl; Cre+ updstream					fl/fl; Cre+ downstream
		mouse 1	mouse 1	mouse 2	mouse 2		mouse 1	mouse 1	mouse 2	mouse 2		mouse 3	mouse 3	mouse 4	mouse 4		mouse 3	mouse 3	mouse 4	mouse 4
	linear	62.5	68.75	60	68.75		73.3333	80	69.2308	66.6667		81.25	53.3333	75	64.2857		62.5	85.7143	61.5385	66.6667
	thick/reticular	31.25	25	26.6667	31.25		26.6667	13.3333	23.0769	13.3333		12.5	26.6667	18.75	28.5714		25	7.14286	23.0769	20
	jagged	6.25	6.25	6.66667	0		0	6.66667	7.69231	20		6.25	20	6.25	7.14286		12.5	7.14286	7.69231	13.3333
	discontinous	0	0	6.66667	0		0	0	0	0		0	0	0	0		0	0	7.69231	0
Multiple t-tests	Significant?	P value	Mean of fl/fl Cre- upstream	Mean of fl/fl Cre+ upstream	Difference	SE of difference	t ratio	df	adjusted P value
straight	No	0.614603	65	68.47	-3.467	6.532	0.5308	6	0.614603
thick	No	0.13765	28.54	21.62	6.92	4.041	1.712	6	0.446987
perpendicular	No	0.219069	4.792	9.911	-5.119	3.73	1.372	6	0.523747
discontinuous	No	0.355918	1.667	0	1.667	1.667	1	6	0.585158
Multiple t-tests	Significant?	P value	Mean of fl/fl Cre- downstream	Mean of fl/fl Cre+ downstream	Difference	SE of difference	t ratio	df	adjusted P value
linear	No	0.63209	72.31	69.1	3.203	6.352	0.5042	6	0.9502
thick/reticular	No	0.956821	19.1	18.8	0.2976	5.273	0.05644	6	0.956821
jagged	No	0.735954	8.59	10.17	-1.577	4.465	0.3533	6	0.9502
discontinous	No	0.355918	0	1.923	-1.923	1.923	1	6	0.827906
