# Supplementary material for: EphrinB2-EphB4 signalling provides Rho-mediated homeostatic control of lymphatic endothelial cell junction integrity
Source: eLife. 2020 Sep 8;9:e57732. doi: 10.7554/eLife.57732 (PMC7478896; doi:10.7554/eLife.57732)
Supplement: Figure 4—source data 1. [file elife-57732-fig4-data1.xlsx]

## Sheet: Sheet1
Figure 4 - source data 1
Source data for Figure 4 A,C,D,F
Figure 4A
Relative EphB4 phosphorylation [%]
normalized to precipitated EphrinB2-Fc
	siCTRL	siCTRL/B2-Fc	siEFNB2	siEFNB2/B2-Fc
Experiment 1	100	520	27	764
Experiment 2	100	280	43	430
Experiment 3	100	465	18	568
Experiment 4	100	370	23	476
	siCTRL	siEFNB2
Theoretical mean	100	100
Actual mean	100	27.75
Number of values	4	4
One sample t test	Sample difference has zero SD
t, df		t=13,36, df=3
P value (two tailed)		0.0009
P value summary		***
Significant (alpha=0.05)?		Yes
How big is the discrepancy?
Discrepancy		-72.25
SD of discrepancy		10.81
SEM of discrepancy		5.406
95% confidence interval		-89,46 to -55,04
R squared (partial eta squared)		0.9835
Figure 4C				Figure 4D
Monlayer permeability / relative permeability [%]				Junctional CLDN5 [%]
FITC dextran efflux				Quantification of junctional CLDN5 immunofluorescence in VE-cadherin+ junctions
	CTRL	B11			CTRL	B11
	89.6599	196.545			79.8267	37.1921
	86.1915	249.139			98.6363	55.8235
	88.4547	163.267			83.1955	50.2258
	100.472	195.875			64.9224	49.7349
					142.954	43.6932
	102.958	241.744			120.958	36.206
	90.686	226.667			109.507
	62.4442	251.243
	137.734	309.129
	112.839	280.218
	106.687	233.584
	Column B	B11			Column B	B11
	vs.	vs,			vs.	vs,
	Column A	CTRL			Column A	CTRL
	Unpaired t test				Unpaired t test
	P value	<0,0001			P value	0.0006
	P value summary	****			P value summary	***
	Significantly different (P < 0.05)?	Yes			Significantly different (P < 0.05)?	Yes
	One- or two-tailed P value?	Two-tailed			One- or two-tailed P value?	Two-tailed
	t, df	t=9,232, df=18			t, df	t=4,791, df=11
	How big is the difference?				How big is the difference?
	Mean of column A	97.81			Mean of column A	100
	Mean of column B	234.7			Mean of column B	45.48
	Difference between means (B - A) ± SEM	136,9 ± 14,83			Difference between means (B - A) ± SEM	-54,52 ± 11,38
	95% confidence interval	105,8 to 168,1			95% confidence interval	-79,57 to -29,48
	R squared (eta squared)	0.8256			R squared (eta squared)	0.6761
Figure 4F
Monlayer permeability / relative permeability [%]
FITC dextran efflux
	siCTRL	siCDH5	siCLND5
	103.116	133.222	148.414
	110.963	110.629	150.306
	108.848	125.487	152.031
	77.0729	108.292	161.992
	99.389	122.207	153.067
	95.3865	126.808	134.738
	105.224	144.988	147.569
		112.93	142.93
	Column B	siCDH5		Column C	siCLDN5
	vs.	vs.		vs.	vs.
	Column A	siCTRL		Column A	siCTRL
	Unpaired t test			Unpaired t test
	P value	0.0026		P value	<0.0001
	P value summary	**		P value summary	****
	Significantly different (P < 0.05)?	Yes		Significantly different (P < 0.05)?	Yes
	One- or two-tailed P value?	Two-tailed		One- or two-tailed P value?	Two-tailed
	t, df	t=3.724, df=13		t, df	t=9.743, df=13
	How big is the difference?			How big is the difference?
	Mean of column A	100		Mean of column A	100
	Mean of column B	123.1		Mean of column C	148.9
	Difference between means (B - A) ± SEM	23.07 ± 6.195		Difference between means (C - A) ± SEM	48.88 ± 5.017
	95% confidence interval	9.686 to 36.45		95% confidence interval	38.04 to 59.72
	R squared (eta squared)	0.5161		R squared (eta squared)	0.8796
