# Supplementary material for: EphrinB2-EphB4 signalling provides Rho-mediated homeostatic control of lymphatic endothelial cell junction integrity
Source: eLife. 2020 Sep 8;9:e57732. doi: 10.7554/eLife.57732 (PMC7478896; doi:10.7554/eLife.57732)
Supplement: Figure 5—source data 1. [file elife-57732-fig5-data1.xlsx]

## Sheet: Sheet1
Figure 5 - source data 1
Source data for Figure 5 B,C,D,F,G
Figure 5B				Figure 5C				Figure 5D
Non-junctional actin / central actin [%]				Relative Rac1 activity [%]				Relative Rac1 activity [%]
Quantification of relative central actin (total actin – junctional actin)				normalized to total precipitated Rac1				normalized to total precipitated Rac1
	CTRL	B11			CTRL	B2-Fc			siCTRL	siEFNB2
	100	161		Experiment 1	100	202		Experiment 1	100	41
	93	144		Experiment 2	100	178		Experiment 2	100	66
	125	164		Experiment 3	100	257		Experiment 3	100	62.5
	101	165
	95	168
	96	169			CTRL	B2-Fc			siCTRL	siEFNB2
	90	109		Theoretical mean	100	100		Theoretical mean	100	100
		154		Actual mean	100	212.3		Actual mean	100	56.5
		178		Number of values	3	3		Number of values	3	3
		169
		187		One sample t test	Sample difference has zero SD			One sample t test	Sample difference has zero SD
				t, df		t=4.804, df=2		t, df		t=5.566, df=2
	Column B	B11		P value (two tailed)		0.0407		P value (two tailed)		0.0308
	vs.	vs,		P value summary		*		P value summary		*
	Column A	CTRL		Significant (alpha=0.05)?		Yes		Significant (alpha=0.05)?		Yes
	Unpaired t test			How big is the discrepancy?				How big is the discrepancy?
	P value	<0,0001		Discrepancy		112.3		Discrepancy		-43.50
	P value summary	****		SD of discrepancy		40.50		SD of discrepancy		13.54
	Significantly different (P < 0.05)?	Yes		SEM of discrepancy		23.38		SEM of discrepancy		7816
	One- or two-tailed P value?	Two-tailed		95% confidence interval		11.72 to 212.9		95% confidence interval		-77.13 to -9.872
	t, df	t=7,088, df=16		R squared (partial eta squared)		0.9203		R squared (partial eta squared)		0.9394
	How big is the difference?
	Mean of column A	100
	Mean of column B	160.7
	Difference between means (B - A) ± SEM	60,73 ± 8,568
	95% confidence interval	42,56 to 78,89
	R squared (eta squared)	0.7585
Figure 5F
Non-junctional actin / central actin [%]
Quantification of relative central actin (total actin – junctional actin)
	CTRL	B11	CTRL + Y27632	B11 + Y27632
	109	151	71	121
	130	151	114	109
	119	162	103	97
	96	127	79	105
	109	167	96	108
	37	157	77	111
		176		84
		149		97
		148
	Column B	B11		Column D	B11 + Y27632
	vs.	vs,		vs.	vs,
	Column A	CTRL		Column B	B11
	Unpaired t test			Unpaired t test
	P value	0.0007		P value	<0,0001
	P value summary	***		P value summary	****
	Significantly different (P < 0.05)?	Yes		Significantly different (P < 0.05)?	Yes
	One- or two-tailed P value?	Two-tailed		One- or two-tailed P value?	Two-tailed
	t, df	t=4,452, df=13		t, df	t=8,151, df=15
	How big is the difference?			How big is the difference?
	Mean of column A	100		Mean of column B	154.2
	Mean of column B	154.2		Mean of column D	104
	Difference between means (B - A) ± SEM	54,22 ± 12,18		Difference between means (D - B) ± SEM	-50,22 ± 6,161
	95% confidence interval	27,91 to 80,53		95% confidence interval	-63,35 to -37,09
	R squared (eta squared)	0.6039		R squared (eta squared)	0.8158
Figure 5G
	CTRL	B11	CTRL + Y27632	B11 + Y27632
	104.046	257.211	73.9395	94.4964
	94.2571	162.127	82.184	113.683
	111.725	147.683	116.337	125.256
	99.2821	201.631	122.101	105.612
	95.7798	243.985	93.7568	113.313
	94.9097	149.924	146.574	211.595
		264.89
		229.889
		235.936
	Column B	B11		Column D	B11 + Y27632
	vs.	vs,		vs.	vs,
	Column A	CTRL		Column B	B11
	Unpaired t test			Unpaired t test
	P value	<0,0001		P value	0.0039
	P value summary	****		P value summary	**
	Significantly different (P < 0.05)?	Yes		Significantly different (P < 0.05)?	Yes
	One- or two-tailed P value?	Two-tailed		One- or two-tailed P value?	Two-tailed
	t, df	t=5,699, df=13		t, df	t=3,499, df=13
	How big is the difference?			How big is the difference?
	Mean of column A	100		Mean of column B	210.4
	Mean of column B	210.4		Mean of column D	127.3
	Difference between means (B - A) ± SEM	110,4 ± 19,36		Difference between means (D - B) ± SEM	-83,04 ± 23,73
	95% confidence interval	68,53 to 152,2		95% confidence interval	-134,3 to -31,77
	R squared (eta squared)	0.7142		R squared (eta squared)	0.485
